# Supplementary material for: Iron(iii) bromide catalyzed bromination of 2-tert-butylpyrene and corresponding position-dependent aryl-functionalized pyrene derivatives
Source: Royal Society of Chemistry journal article supplement (doi:10.1039/c4ra12216j), 2014-12-04
Supplement: c4ra12216j1.pdf [file c4ra12216j1.pdf]

# Supporting Information for

## Iron (III) Bromide Catalyzed Bromination of 2-*tert*-Butylpyrene and Corresponding Positions-Dependent Aryl-Functionalized Pyrene Derivatives

Xing Feng,<sup>a,b</sup> Jian-Yong Hu,<sup>b,c</sup> Hirotsugu Tomiyasu,<sup>b</sup> Zhu Tao,<sup>d</sup> Carl Redshaw,<sup>e</sup>  
Mark R.J. Elsegood,<sup>f</sup> Lynne Horsburgh,<sup>f</sup> Simon J. Teat,<sup>g</sup> Xian-Fu Wei,<sup>a</sup> and  
Takehiko Yamato<sup>\*b</sup>

<sup>a</sup> School of Printing and Packing Engineering, Beijing Institute of Graphic Communication, 1 Xinghua Avenue (Band Two), Daxing, Beijing 102600 P.R. China,

<sup>b</sup> Department of Applied Chemistry, Faculty of Science and Engineering, Saga University, Honjo-machi 1, Saga 840-8502 Japan. E-mail: yamatot@cc.saga-u.ac.jp

<sup>c</sup> Emergent Molecular Function Research Group, RIKEN Center for Emergent Matter Science (CEMS), Wako, Saitama 351-0198, Japan

<sup>d</sup> Key Laboratory of Macrocyclic and Supramolecular Chemistry of Guizhou Province, Guizhou University, Guiyang, Guizhou, 550025, P. R. China.

<sup>e</sup> Department of Chemistry, The University of Hull, Cottingham Road, Hull, Yorkshire, HU6 7RX, UK.

<sup>f</sup> Chemistry Department, Loughborough University, Loughborough, LE113TU, UK.

<sup>g</sup> ALS, Berkeley Lab, 1 Cyclotron Road, MS2-400, Berkeley, CA 94720, USA.

## Table of Contents

- 1 300 MHz  $^1\text{H}$ NMR spectrum of **1** and **2a**
- 2 300 MHz  $^1\text{H}$ NMR spectrum of **2b** and **2c**
- 3 300 MHz  $^1\text{H}$ NMR spectrum of **2d** and **2e**
- 4 300 MHz  $^1\text{H}$ NMR spectrum of **2f** and **3a**
- 5 300 MHz  $^1\text{H}$ NMR spectrum of **3b** and **3c**
- 6 300 MHz  $^1\text{H}$ NMR spectrum of **3b** and 400 MHz  $^1\text{H}$ NMR spectrum **3c**
- 7 300 MHz  $^1\text{H}$ NMR spectrum of **3e** and **3f**
- 8 100 MHz  $^{13}\text{C}$ NMR spectrum of **3a** and **3b**
- 9 100 MHz  $^{13}\text{C}$ NMR spectrum of **3c** and **3e**
- 10 75 MHz  $^{13}\text{C}$ NMR spectrum of **3f**
- 11 the key crystallographic data of **3**
- 12 Mechanism of bromination of 2-*tert*-butyl pyrene
- 13 Quantum Chemistry Computation

## Copy of NMR Spectra

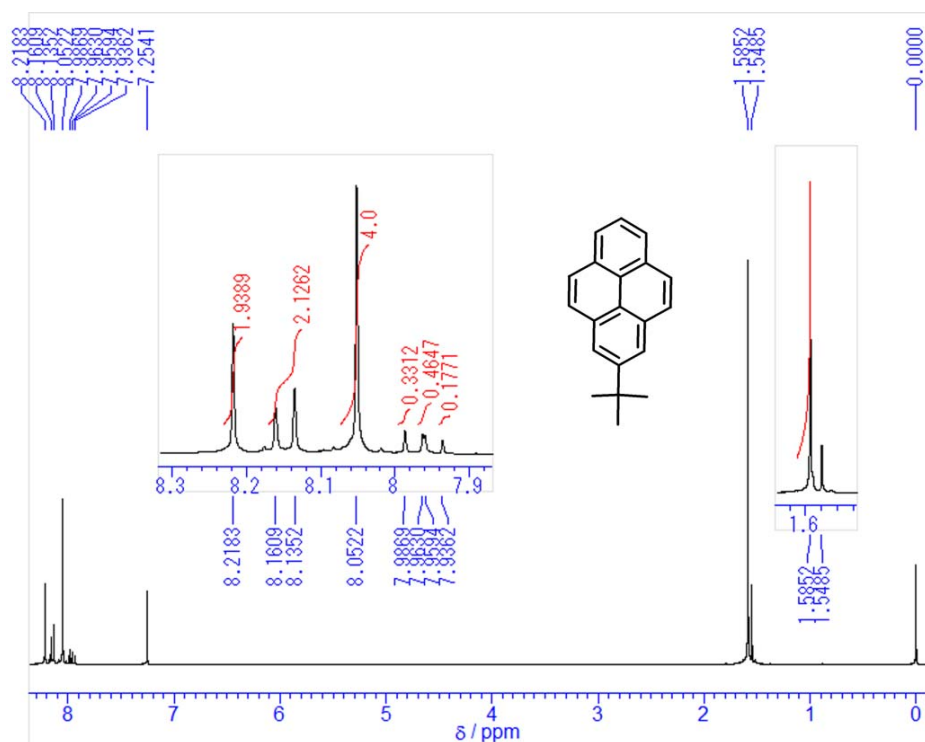

**Figure S1-1** <sup>1</sup>H-NMR spectrum (300 MHz, 293K, \* CDCl<sub>3</sub>) for **1** including an expansion of the aromatic region.

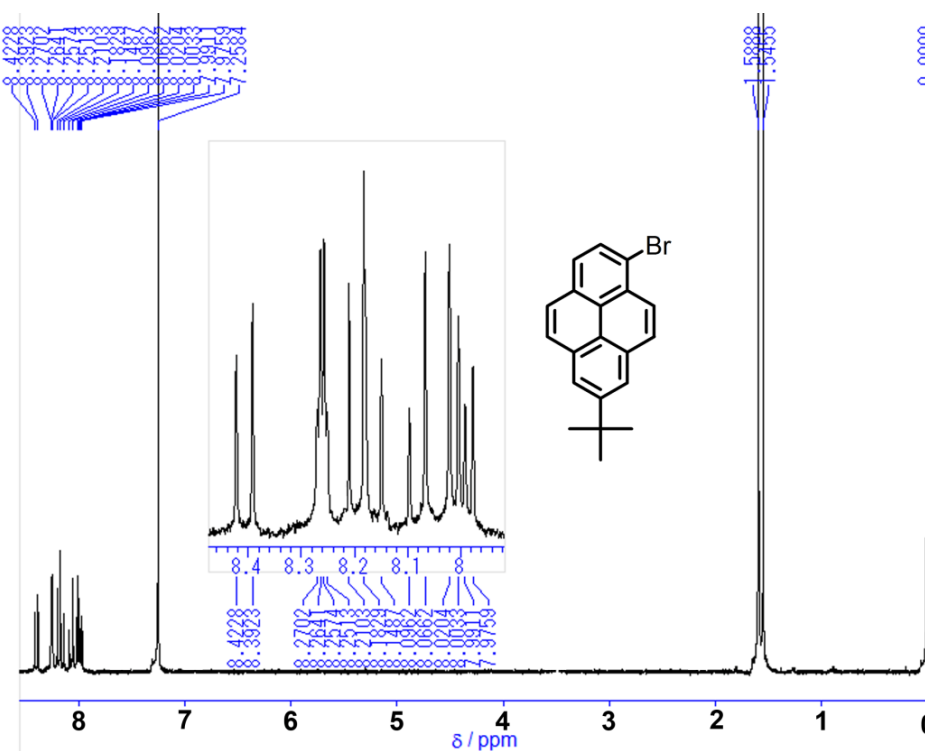

**Figure S1-2** <sup>1</sup>H-NMR spectrum (300 MHz, 293K, \* CDCl<sub>3</sub>) for **2a** including an expansion of the aromatic region.

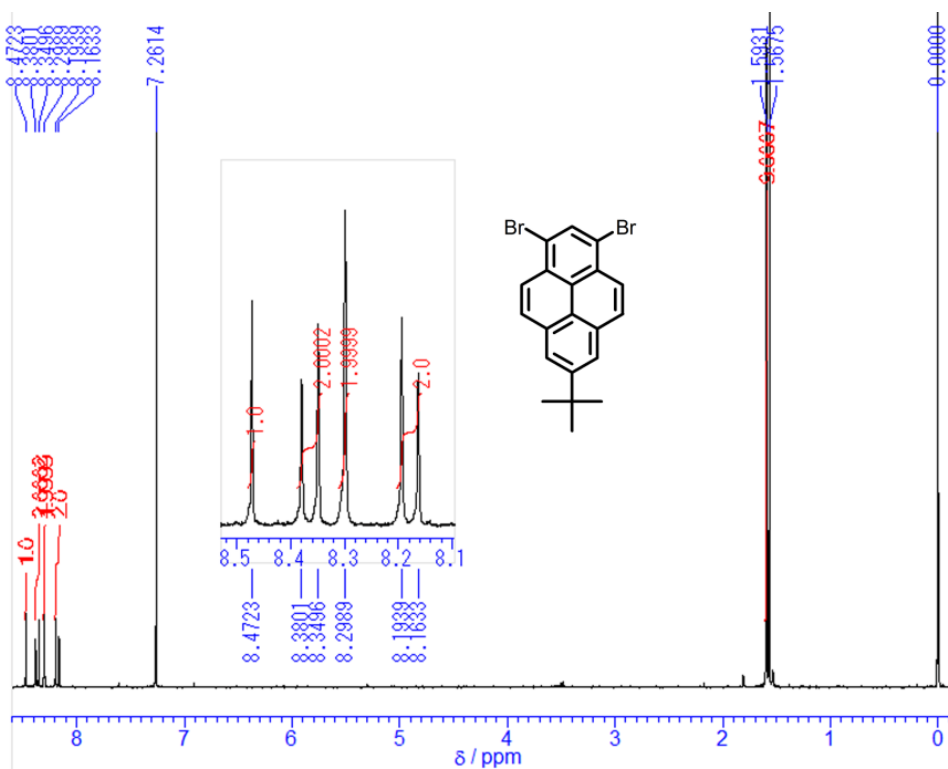

**Figure S1-3**  $^1\text{H-NMR}$  spectrum (300 MHz, 293K, \*  $\text{CDCl}_3$ ) for **2b** including an expansion of the aromatic region.

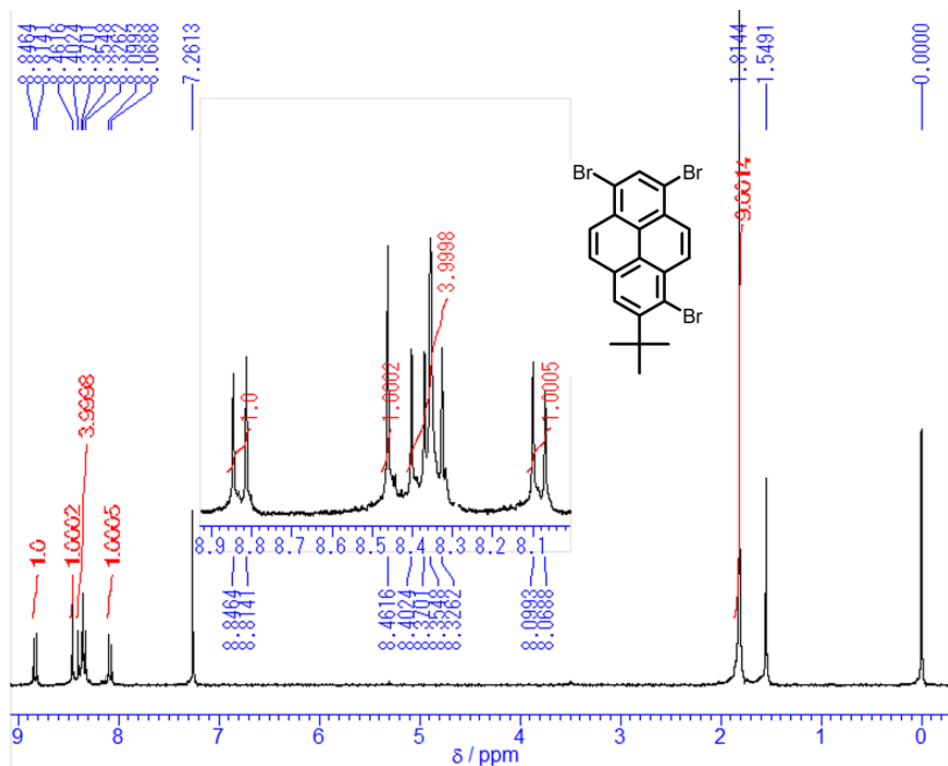

**Figure S1-4**  $^1\text{H-NMR}$  spectrum (300 MHz, 293K, \*  $\text{CDCl}_3$ ) for **2c** including an expansion of the aromatic region.

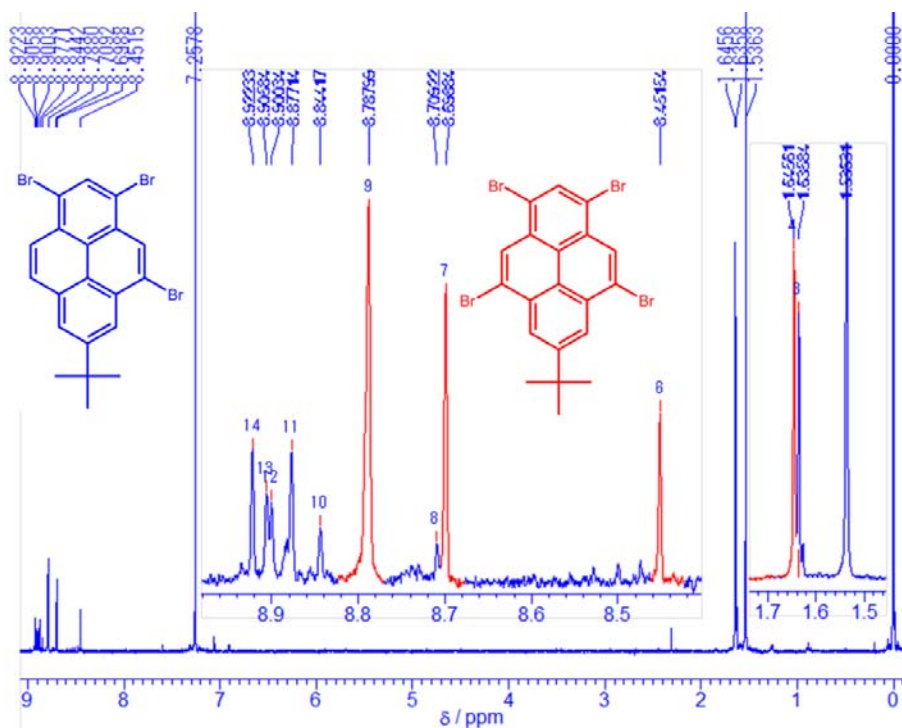

**Figure S1-5**  $^1\text{H-NMR}$  spectrum (300 MHz, 293K, \*  $\text{CDCl}_3$ ) of mixture **2d** and **2f** including an expansion of the aromatic region.

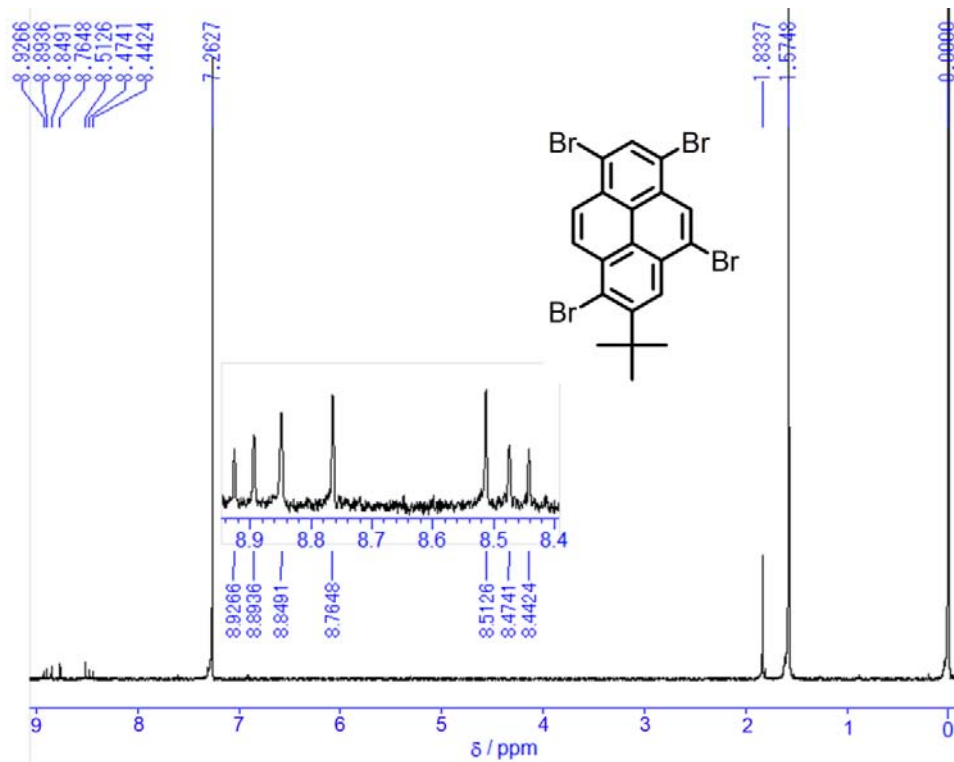

**Figure S1-6**  $^1\text{H-NMR}$  spectrum (300 MHz, 293K, \*  $\text{CDCl}_3$ ) for **2e** including an expansion of the aromatic region.

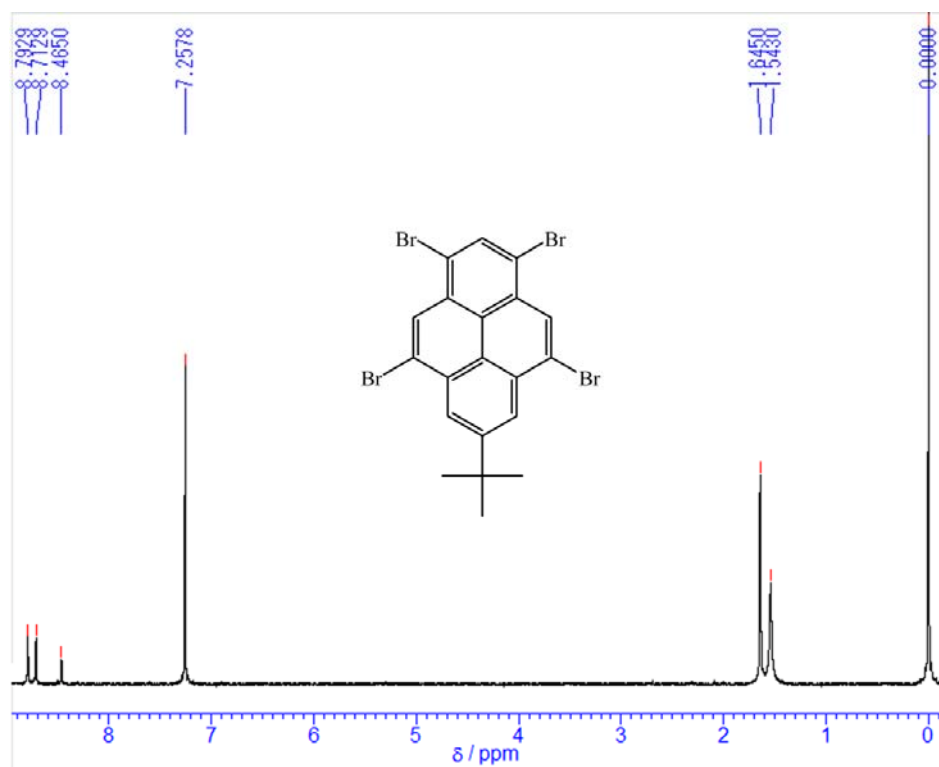

**Figure S1-14**  $^1\text{H-NMR}$  spectrum (300 MHz, 293K, \*  $\text{CDCl}_3$ ) for **3f**.

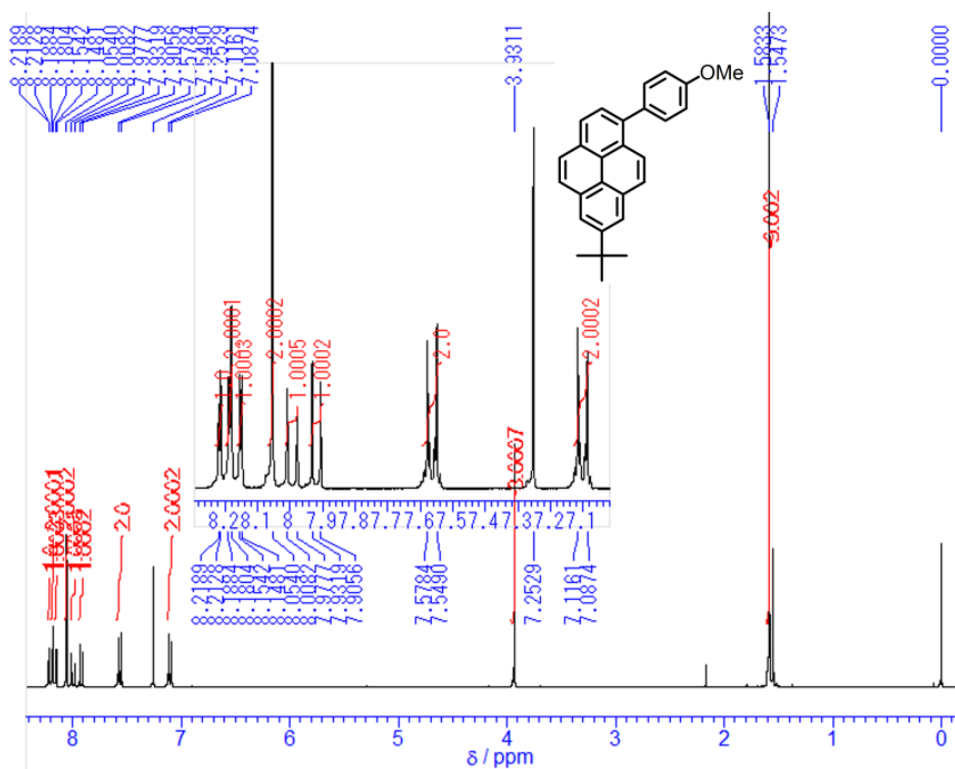

**Figure S1-8**  $^1\text{H-NMR}$  spectrum (300 MHz, 293K, \*  $\text{CDCl}_3$ ) for **3a** including an expansion of the aromatic region.

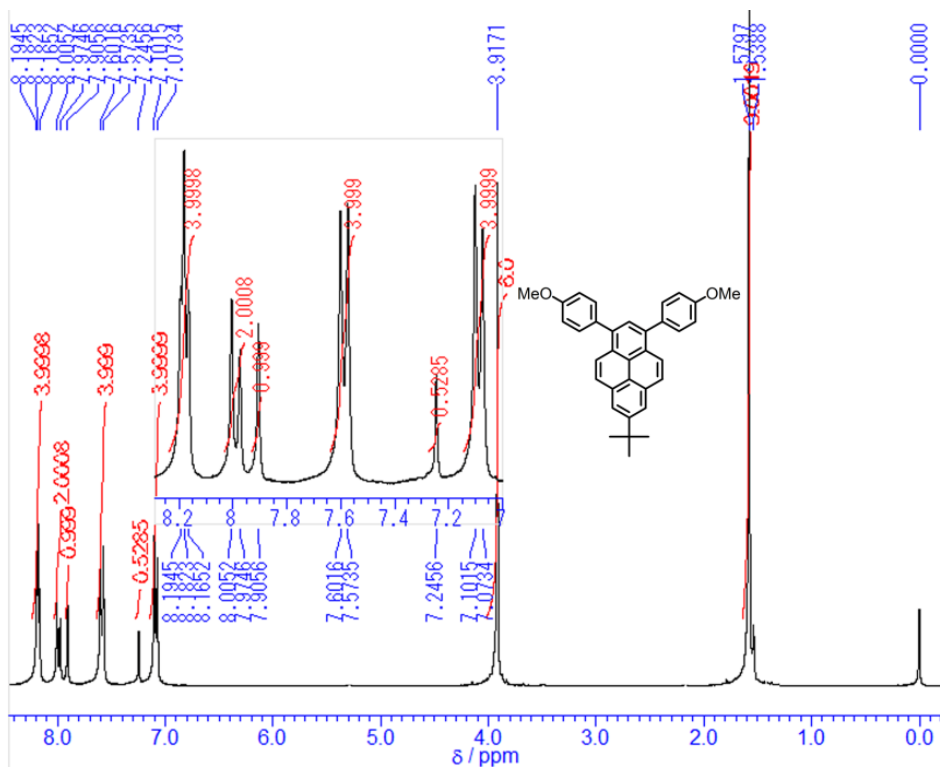

**Figure S1-9**  $^1\text{H-NMR}$  spectrum (300 MHz, 293K, \*  $\text{CDCl}_3$ ) for **3b** including an expansion of the aromatic region.

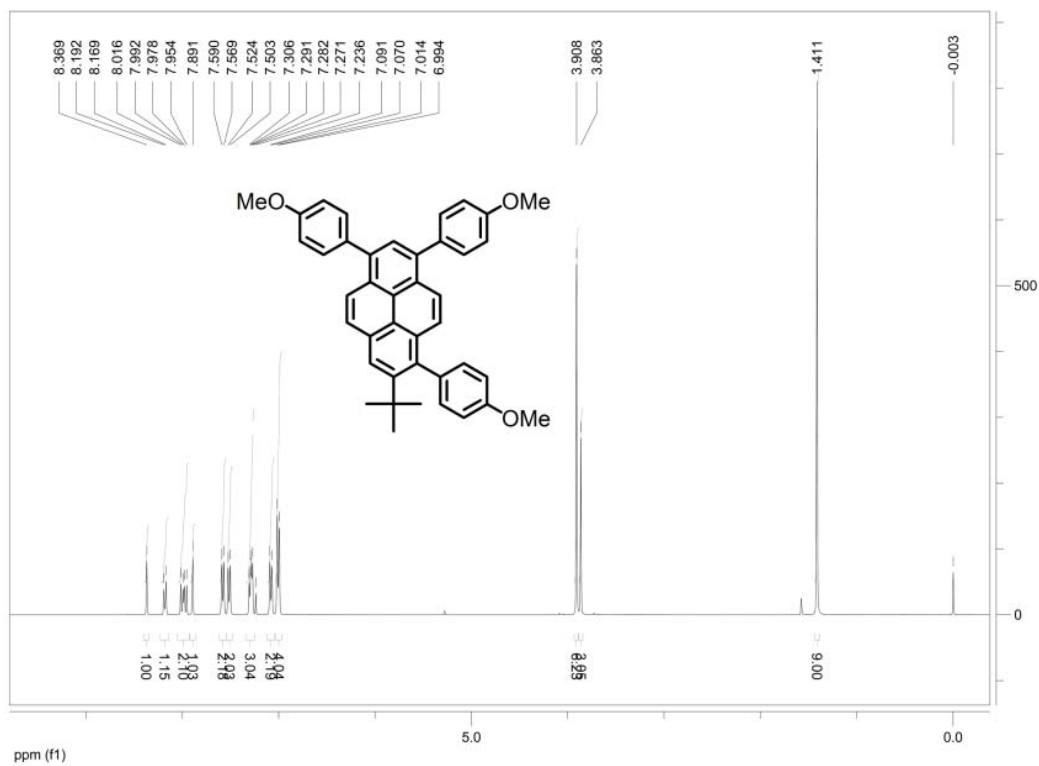

**Figure S1-10**  $^1\text{H-NMR}$  spectrum (400 MHz, 293K, \*  $\text{CDCl}_3$ ) for **3c**.





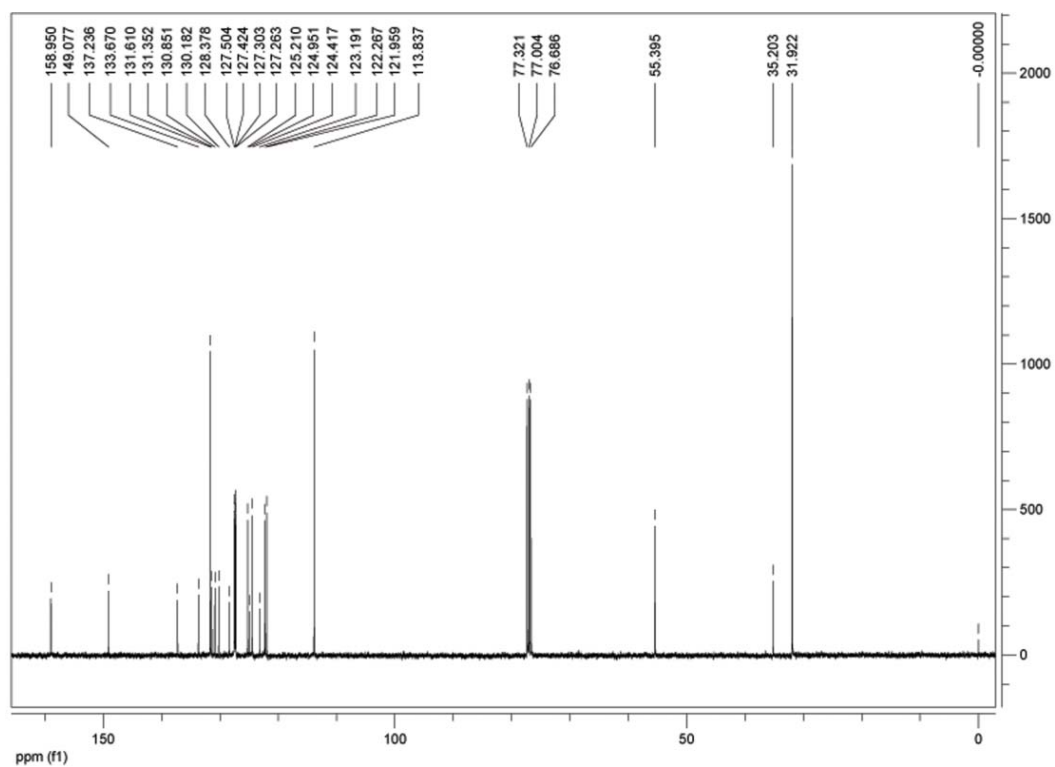

Figure S1-13  $^{13}\text{C}$ -NMR spectrum (100 MHz, 293K, \*  $\text{CDCl}_3$ ) for **3a**.

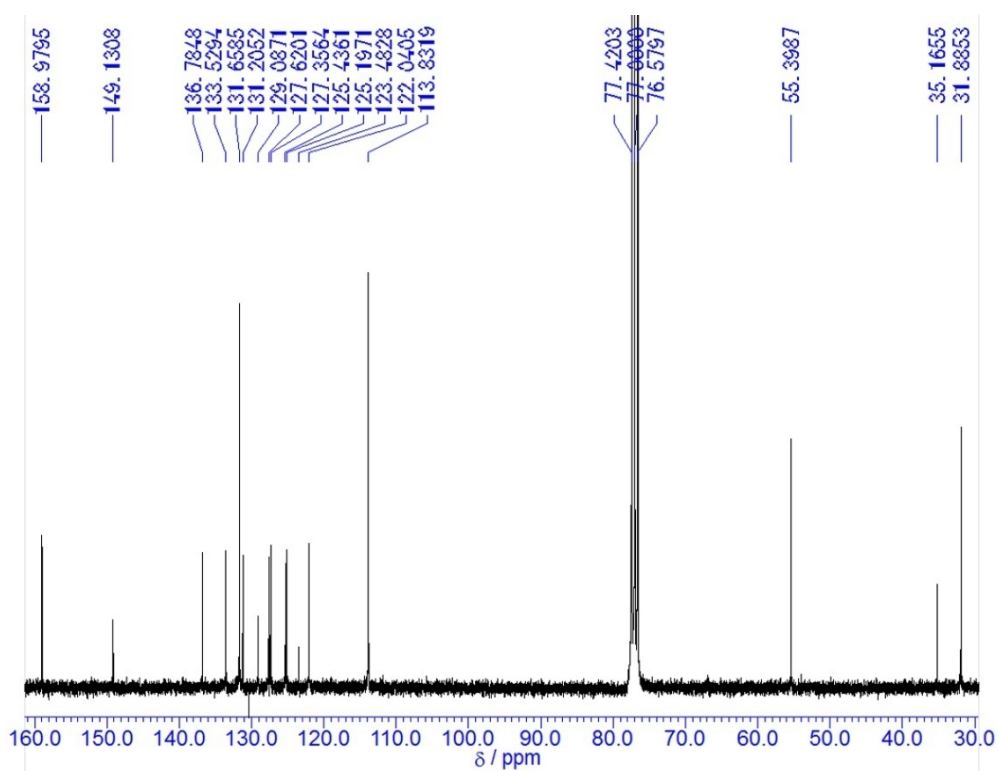

Figure S1-14  $^{13}\text{C}$ -NMR spectrum (75 MHz, 293K, \*  $\text{CDCl}_3$ ) for **3b**.

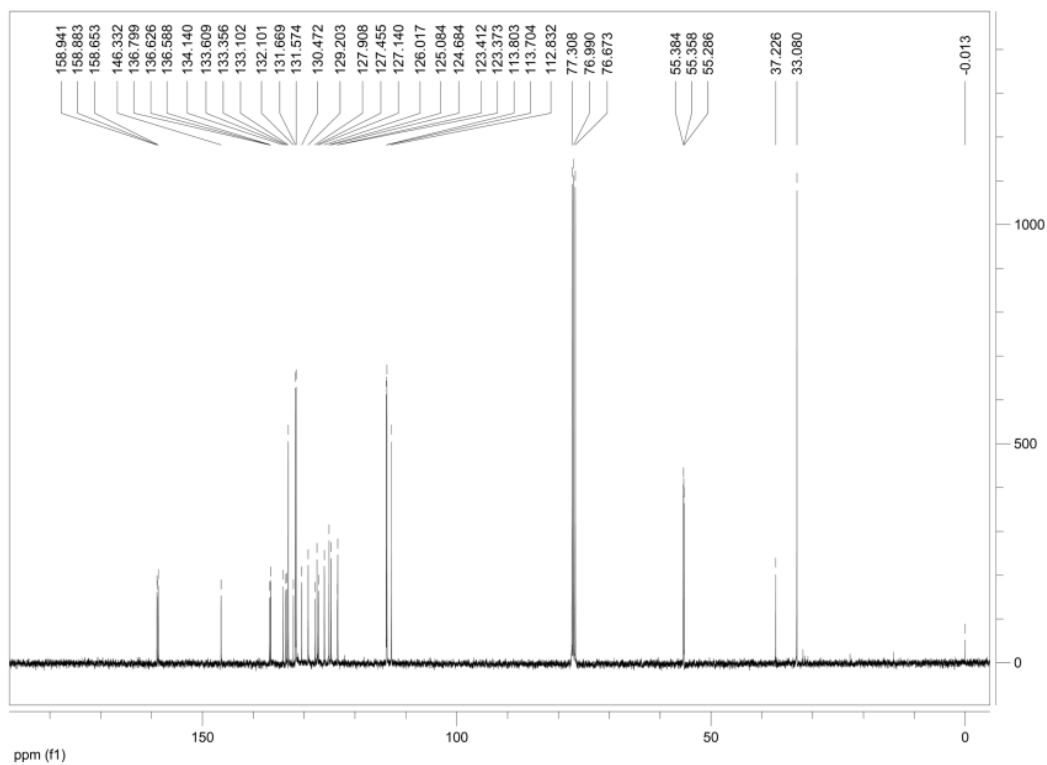

Figure S1-15  $^{13}\text{C}$ -NMR spectrum (100 MHz, 293K, \*  $\text{CDCl}_3$ ) for **3c**.

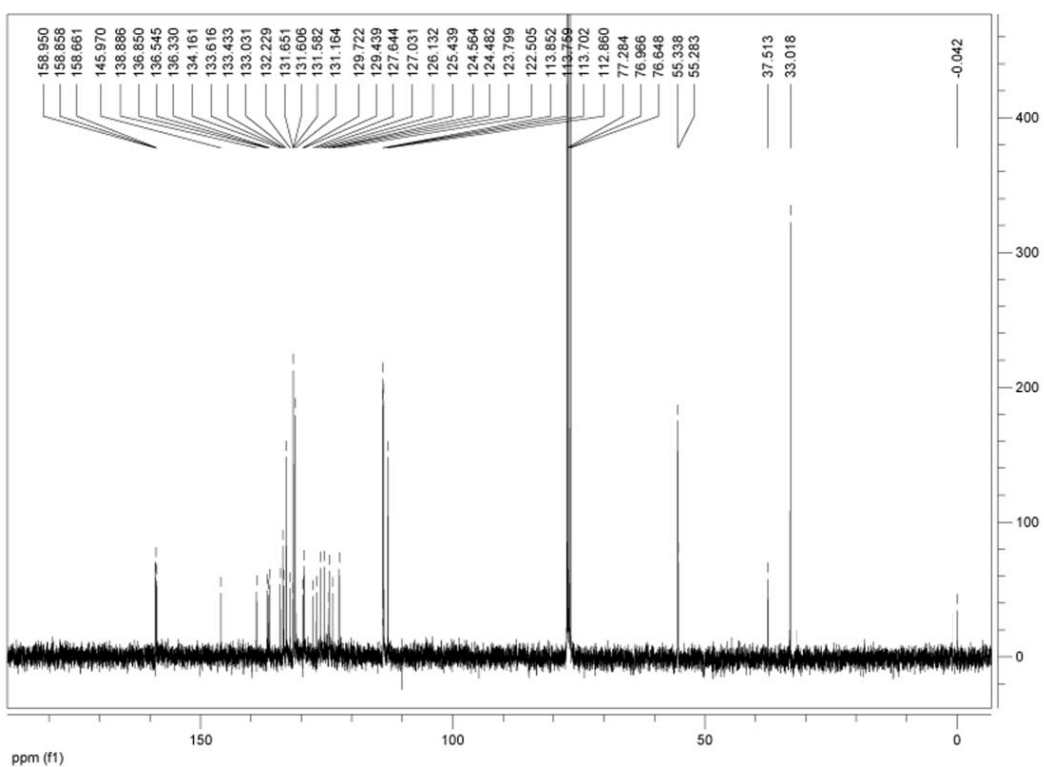

Figure S1-16  $^{13}\text{C}$ -NMR spectrum (100 MHz, 293K, \*  $\text{CDCl}_3$ ) for **3e**.

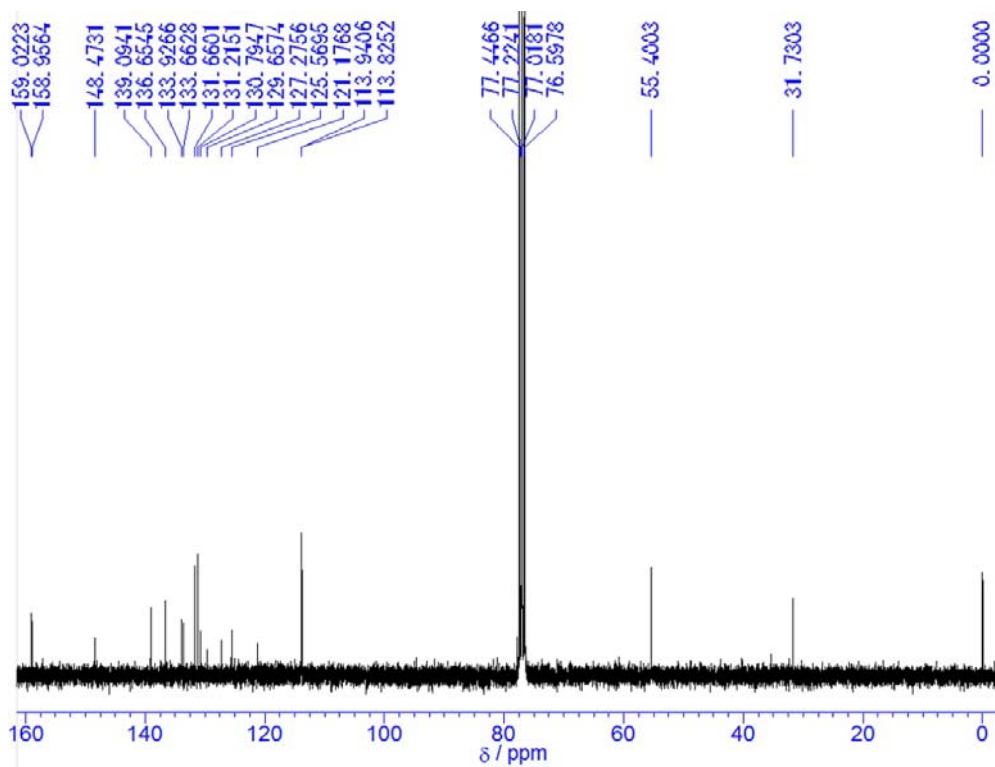

**Figure S1-17**  $^{13}\text{C}$ -NMR spectrum (75 MHz, 293K, \*  $\text{CDCl}_3$ ) for **3f**.

## Mechanism of bromination of 2-*tert*-butyl pyrene

Table S1 the ratio of benzenoid rings and double bonds<sup>[1]</sup>

| Structure                                                                          | Ratio             | Coefficients | Nb | Ne |
|------------------------------------------------------------------------------------|-------------------|--------------|----|----|
| 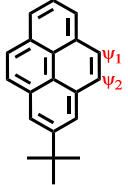  | $\psi_1 : \psi_2$ | 1.31         | 2  | 2  |
|   | $\psi_3 : \psi_4$ | 1.27         | 3  | 2  |
|  | $\psi_5 : \psi_6$ | 1.00         | 1  | 1  |

Nb=number of benzenoid rings ;Ne=number of exposed bonds

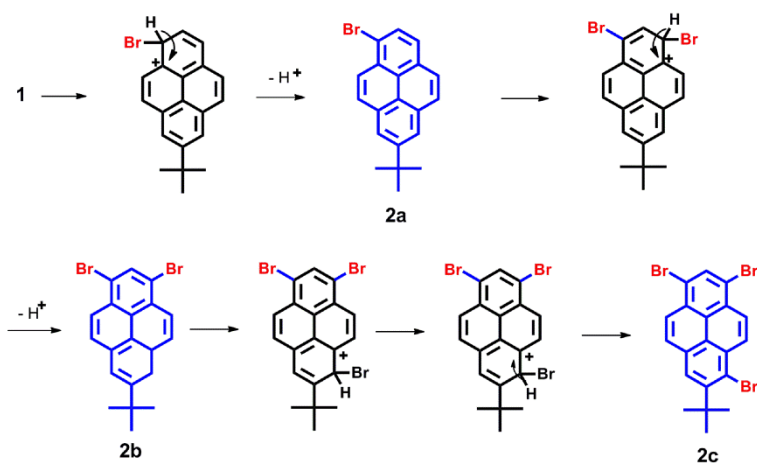

**Scheme S1** Possible regioselective bromination mechanism of **1**

[1] Moffitt, W. E.; Coulson, C. A. *Proc. Phys. Soc.*; **1948**, *60*, 309–315.

## X-Ray diffraction data

**Table S2** Summary of crystal data of pyrene derivatives **3**

| Parameter                                           | <b>3a</b>                         | <b>3b</b>                                      | <b>3c</b>                                      | <b>3d</b>                                      | <b>3e</b>                                      | <b>3f</b>                                      |
|-----------------------------------------------------|-----------------------------------|------------------------------------------------|------------------------------------------------|------------------------------------------------|------------------------------------------------|------------------------------------------------|
| Empirical formula                                   | C <sub>27</sub> H <sub>24</sub> O | C <sub>34</sub> H <sub>30</sub> O <sub>2</sub> | C <sub>41</sub> H <sub>36</sub> O <sub>3</sub> | C <sub>41</sub> H <sub>36</sub> O <sub>3</sub> | C <sub>48</sub> H <sub>42</sub> O <sub>4</sub> | C <sub>48</sub> H <sub>42</sub> O <sub>4</sub> |
| Formula weight<br>[g mol <sup>-1</sup> ]            | 364.49                            | 470.61                                         | 576.70                                         | 576.70                                         | 682.81                                         | 682.82                                         |
| Crystal system                                      | orthorhombic                      | monoclinic                                     | Monoclinic                                     | triclinic                                      | monoclinic                                     | triclinic                                      |
| Space group                                         | <i>P b c a</i>                    | <i>P2<sub>1</sub>/c</i>                        | <i>P2<sub>1</sub>/c</i>                        | <i>P -1</i>                                    | <i>P2<sub>1</sub>/c</i>                        | <i>P-1</i>                                     |
| <i>a</i> [Å]                                        | 34.643(4)                         | 18.815(14)                                     | 9.136 (2)                                      | 10.299(6)                                      | 17.5703(6)                                     | 12.642(2)                                      |
| <i>b</i> [Å]                                        | 11.0927(16)                       | 15.629(11)                                     | 17.638 (4)                                     | 12.845(7)                                      | 8.8286(3)                                      | 12.960(2)                                      |
| <i>c</i> [Å]                                        | 10.1811(13)                       | 8.851(6)                                       | 19.524 (4)                                     | 13.482(12)                                     | 24.0368(9)                                     | 13.854(2)                                      |
| $\alpha$ [°]                                        | -                                 | -                                              | -                                              | 111.174(9)                                     | -                                              | 86.048(2)°                                     |
| $\beta$ [°]                                         | -                                 | 103.255(9)                                     | 98.252 (4)°                                    | 103.142(10)                                    | 101.190(2)                                     | 67.354(2)°                                     |
| $\gamma$ [°]                                        | -                                 | -                                              | -                                              | 102.291(7)                                     | -                                              | 60.942(2)°                                     |
| Volume [Å <sup>3</sup> ]                            | 3912.4(9)                         | 2533(3)                                        | 3113.5 (12)                                    | 1531.8(19)                                     | 3657.7(2)                                      | 1811.4(5)                                      |
| <i>Z</i>                                            | 8                                 | 4                                              | 4                                              | 2                                              | 4                                              | 2                                              |
| Density, calcd<br>[gm <sup>-3</sup> ]               | 1.237                             | 1.234                                          | 1.230                                          | 1.250                                          | 1.240                                          | 1.252                                          |
| Temperature [K]                                     | 113                               | 123                                            | 150                                            | 296(2)                                         | 100(2)                                         | 150(2)                                         |
| Unique reflns                                       | 3495                              | 5722                                           | 7734                                           | 5187                                           | 73709                                          | 10122                                          |
| Obsdreflns                                          | 2925                              | 4734                                           | 6709                                           | 3075                                           | 13376                                          | 7260                                           |
| Parameters                                          | 257                               | 330                                            | 500                                            | 397                                            | 637                                            | 476                                            |
| <i>R</i> <sub>int</sub>                             | 0.0475                            | 0.0640                                         | 0.034                                          | 0.0535                                         | 0.0404                                         | 0.0255                                         |
| R[ <i>I</i> >2 $\sigma$ ( <i>I</i> )] <sup>a</sup>  | 0.0360                            | 0.1034                                         | 0.048                                          | 0.0911                                         | 0.0441                                         | 0.0475                                         |
| wR[ <i>I</i> >2 $\sigma$ ( <i>I</i> )] <sup>b</sup> | 0.1041                            | 0.3036                                         | 0.146                                          | 0.2649                                         | 0.1317                                         | 0.1413                                         |
| GOF on F <sup>2</sup>                               | 1.123                             | 1.186                                          | 1.06                                           | 0.988                                          | 1.035                                          | 1.047                                          |

<sup>a</sup> Conventional R on F<sub>hkl</sub>:  $\Sigma||F_o| - |F_c||/\Sigma|F_o|$ . <sup>b</sup> Weighted R on |F<sub>hkl</sub>|<sup>2</sup>:  $\Sigma[w(F_o^2 - F_c^2)^2]/\Sigma[w(F_o^2)]^{1/2}$

# Quantum Chemistry Computation

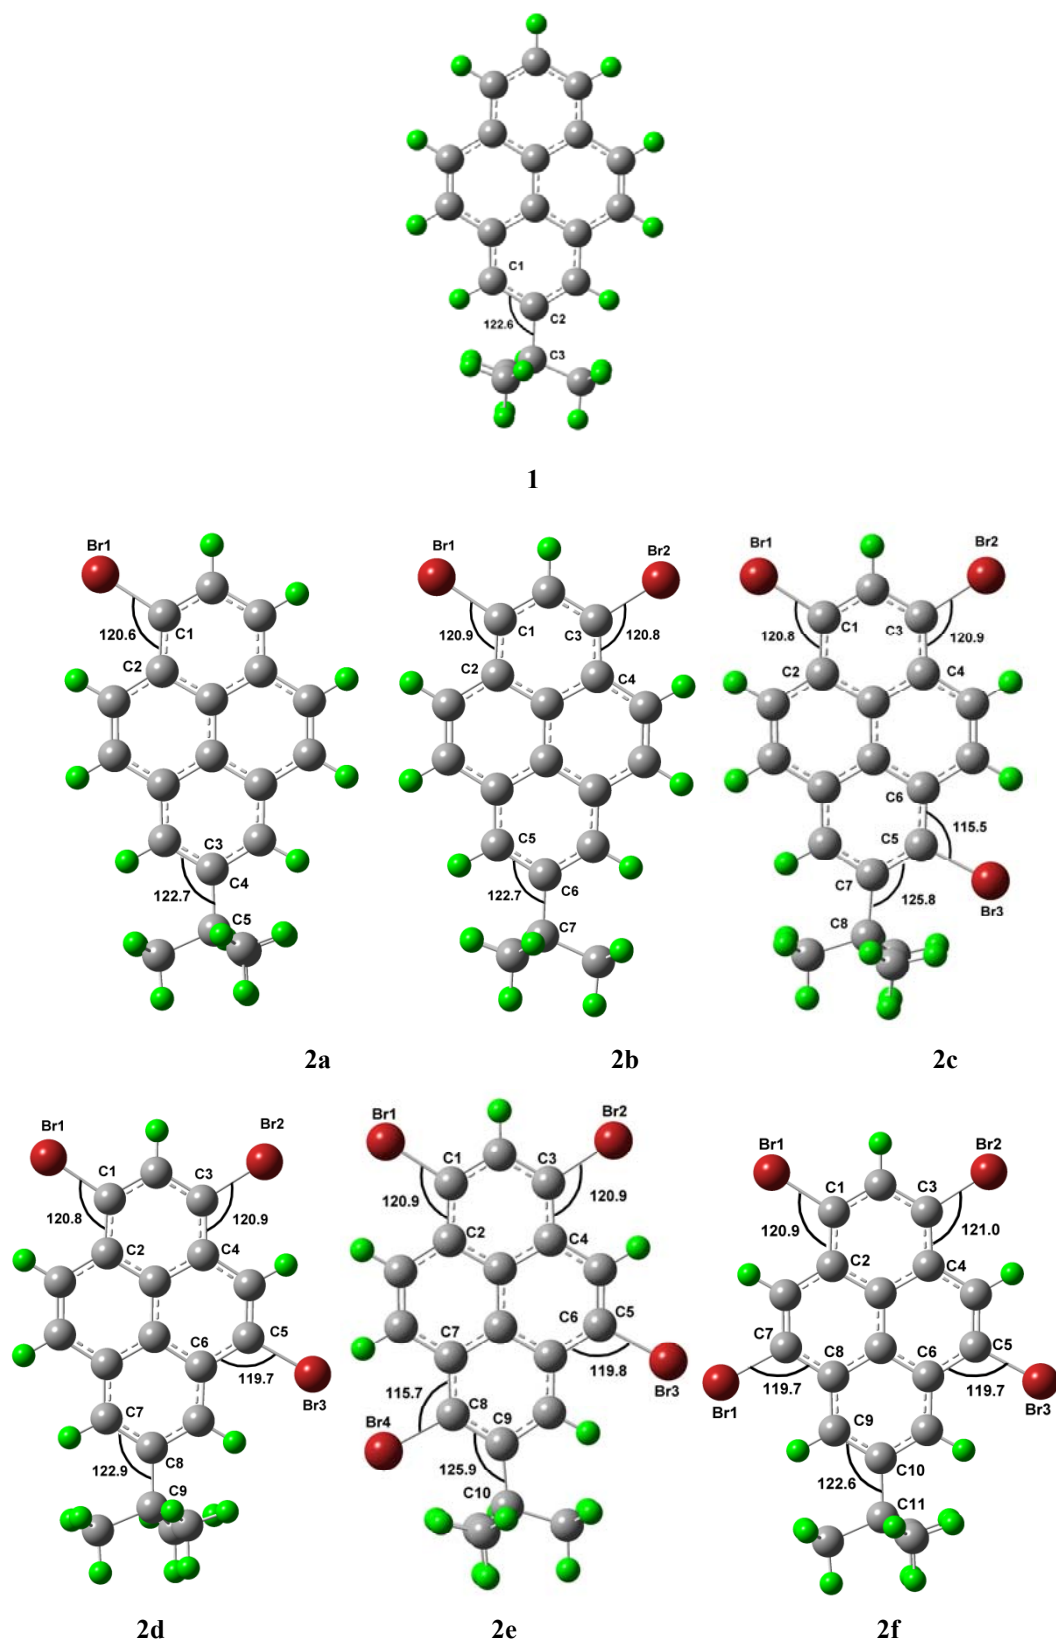

**Figure S2-2** Geometric structures of bromo-substituted pyrene **2** in the FeBr<sub>3</sub>-catalyzed reactions. The unit of angle is in °.

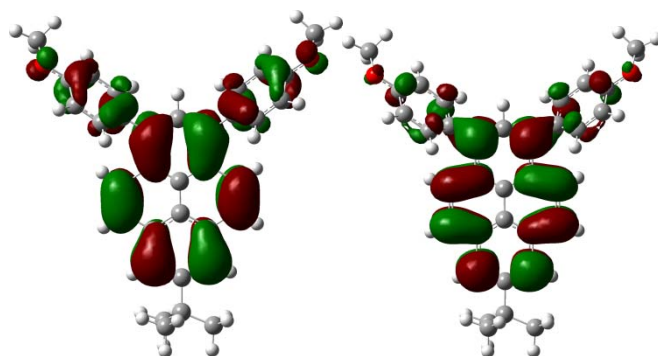

**Figure S3-1** Computed molecular orbital plots (B3LYP/6-31G\*) for **3b**: The left plots represent the HOMOs, and the right plots represent the LUMOs.

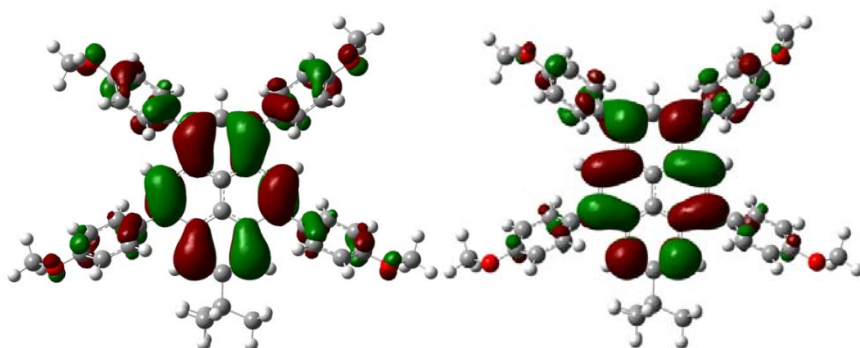

**Figure S3-2** Computed molecular orbital plots (B3LYP/6-31G\*) for **3f**: The left plots represent the HOMOs, and the right plots represent the LUMOs.

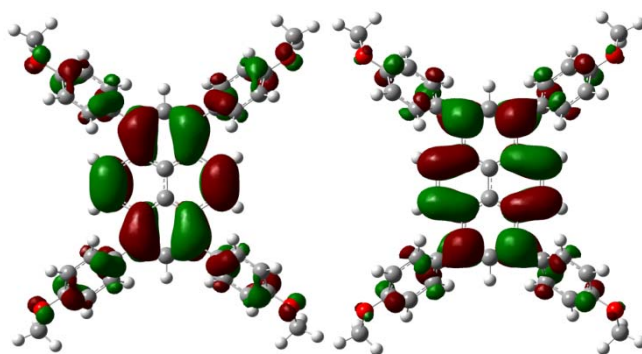

**Figure S3-3** Computed molecular orbital plots (B3LYP/6-31G\*) for **4**: The left plots represent the HOMOs, and the right plots represent the LUMOs.

Table S3. Physical and electrochemical properties of compounds **3**, **4** and **5**.

| Compound  | <u>LUMO</u><br>(eV) <sup>[a]</sup> | <u>LUMO</u><br>(eV) <sup>[b]</sup> | <u>E<sub>ox</sub><sup>1/2</sup></u> <sup>[c]</sup><br>(eV) | <u>E<sub>ox</sub><sup>onset</sup></u> <sup>[d]</sup><br>(eV) | <u>E<sub>ox</sub>(Fc)</u> <sup>onset</sup> <sup>[d]</sup><br>(eV) | <u>HOMO</u><br>(eV)          | <u>HOMO-LUMO</u><br>$\Delta E$ (eV)       |
|-----------|------------------------------------|------------------------------------|------------------------------------------------------------|--------------------------------------------------------------|-------------------------------------------------------------------|------------------------------|-------------------------------------------|
| <b>3a</b> | -1.41                              | nd                                 | nd                                                         | nd                                                           | nd                                                                | -5.06 <sup>[a]</sup> / nd    | 3.65 <sup>[a]</sup> / 3.30 <sup>[e]</sup> |
| <b>3b</b> | -1.41                              | -2.27                              | 1.45                                                       | 1.36                                                         | 0.66                                                              | -4.93 / -5.44 <sup>[b]</sup> | 3.51 / 3.17                               |
| <b>3c</b> | -1.39                              | -2.13                              | 1.51                                                       | 1.32                                                         | 0.64                                                              | -4.84 / -5.06                | 3.45 / 3.13                               |
| <b>3d</b> | -1.39                              | nd                                 | nd                                                         | nd                                                           | nd                                                                | -4.82 / nd                   | 3.43 / nd                                 |
| <b>3e</b> | -1.39                              | -2.33                              | 1.64                                                       | 1.59                                                         | 0.65                                                              | -4.76 / -5.36                | 3.37 / 3.03                               |
| <b>3f</b> | -1.36                              | -2.34                              | 1.67                                                       | 1.61                                                         | 0.65                                                              | -4.76 / -5.37                | 3.40 / 3.03                               |
| <b>4</b>  | -1.47                              | nd                                 | nd                                                         | nd                                                           | nd                                                                | -4.71 / nd                   | 3.24 / 2.94                               |
| <b>5</b>  | -1.22                              | nd                                 | nd                                                         | nd                                                           | nd                                                                | -4.93 / nd                   | 3.70 / 3.31                               |

<sup>[a]</sup>DFT/B3LYP/6-31G\* using Gaussian, <sup>[b]</sup>HOMO and LUMO energy levels were calculated according to equations:  $-(4.8+E_{ox}^{onset})$  and  $LUMO = HOMO + E_g$ , <sup>[c]</sup> $E_{ox}^{1/2}$  is the half-wave potential of the oxidative waves, <sup>[d]</sup> $E_{ox}^{onset}$  is the onset potential of the first oxidative wave, with potentials *versus* Fc/Fc<sup>+</sup> couple. <sup>[e]</sup> $E_g$ : estimated from UV-vis absorption spectra in solution. nd. No determination.
